# Supplementary material
Source: ML conference proceedings conference paper supplement (https://openreview.net/forum?id=OyIzNLAQfE)

# CIFAR10

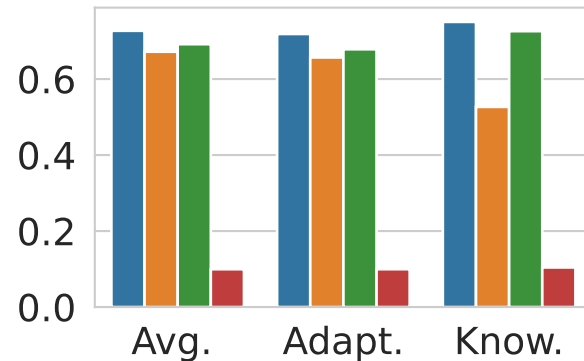

# CIFAR100

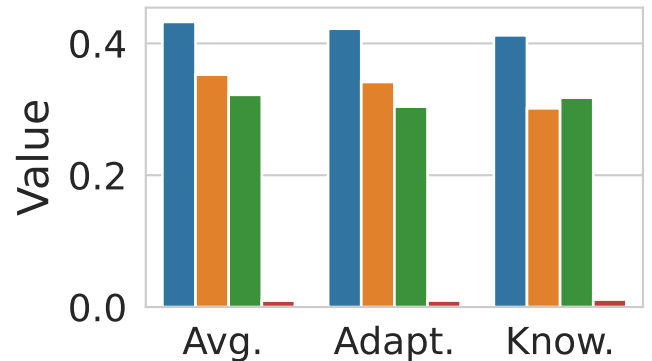

# Mini-ImageNet

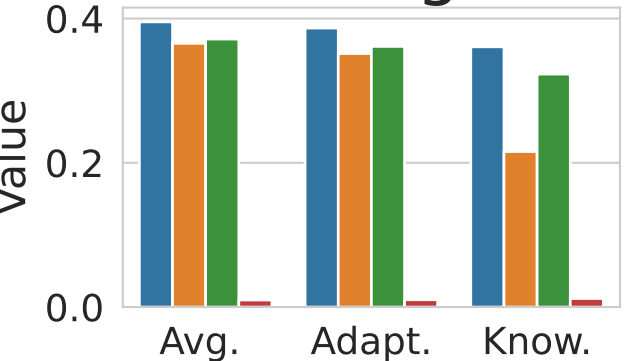

# Tiny-ImageNet

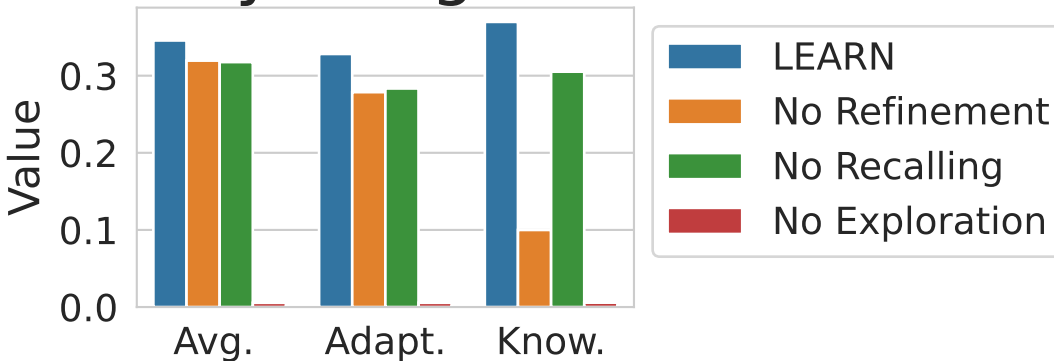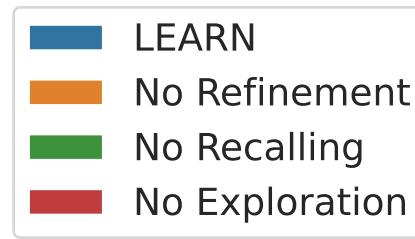

Supplement: supplementary_material [file attachment]
